# Supplementary material for: PtCu nanoalloy loaded on sulfur-doped porous g-C3N4 for electrocatalytic hydrogen evolution
Source: Royal Society of Chemistry journal article supplement (doi:10.1039/d4nj00135d), 2024-01-01
Supplement: d4nj00135d1.pdf [file d4nj00135d1.pdf]

## Supporting Information

### **PtCu nanoalloy loaded on sulfur-doped porous g-C<sub>3</sub>N<sub>4</sub> for electrocatalytic hydrogen evolution**

*Can Chang<sup>a</sup>, Jicheng Wu<sup>a</sup>, Dandan Wu<sup>a,\*</sup>, Guojian Jiang<sup>a,b,c,d,e,f,\*</sup>, Xiaowei Xu<sup>a</sup>,  
Shufang Chang<sup>a</sup>*

<sup>a</sup>School of Materials Science and Engineering, Shanghai Institute of Technology, 100 Haiquan Road, Shanghai 201418, R. P. China.

<sup>b</sup>State Key Laboratory of Urban Water Resource and Environment, Harbin Institute of Technology, Harbin 150090, P. R. China.

<sup>c</sup>State Key Laboratory of Crystal Materials, Shandong University, Jinan, Shandong, 250100, P. R. China.

<sup>d</sup>Infrared and Low Temperature Plasma Key Laboratory of Anhui Province, college of Electronic Countermeasures, NUDT, Hefei 230037, P. R. China.

<sup>e</sup>State Key Laboratory of Mineral Processing, Beijing 102628, P. R. China.

<sup>f</sup>State Key Lab Advanced Metals and Materials, Beijing 100083, P. R. China.

Corresponding author: [wdan1008@163.com](mailto:wdan1008@163.com)

## Materials

The  $\text{H}_2\text{PtCl}_6 \cdot 6\text{H}_2\text{O}$ ,  $\text{CuCl}_2 \cdot 2\text{H}_2\text{O}$ , ethylene glycol and formaldehyde were purchased from Sinopharm Chemical Reagent Co. Ltd. The Nafion (5 wt %) was obtained from Sigma-Aldrich Co. The commercial 20 wt% Pt/C catalysts were obtained from momolab Co. Other reagents were analytical reagent grade. Deionized water was used throughout the experiments.

## Characterizations

The crystalline structure of the sample was characterized using the Dutch X'Pert Pro MPD X-ray diffractometer in  $2\theta$  mode within the range of  $10^\circ$  to  $80^\circ$  at a scanning rate of  $2^\circ \cdot \text{min}^{-1}$ , employing Cu  $K\alpha$  radiation. Surface composition and chemical states of the catalyst were investigated through X-ray photoelectron spectroscopy (XPS) using Al  $K\alpha$  radiation (1486 eV) as a probe on the Thermo Scientific K-Alpha. Characterization of the catalyst was performed using transmission electron microscopy (TEM), high-resolution transmission electron microscopy (HRTEM), high-angle annular dark-field scanning transmission electron microscopy (HAADF-STEM), and energy-dispersive X-ray spectroscopy (EDS) at an accelerating voltage of 200 kV with the JEOL JEM 2100F transmission electron microscope.

## Electrochemical measurements

All electrochemical measurements were conducted on the CHI 760E electrochemical workstation (Shanghai CH Instruments Co., Ltd.). In a  $\text{N}_2$ -saturated 0.5 M  $\text{H}_2\text{SO}_4$  solution, traditional three-electrode systems were employed for electrochemical experiments. The glassy carbon electrode loaded with the catalyst served as the working electrode, a saturated calomel electrode was used as the reference electrode, and a graphite rod acted as the counter electrode. Prior to testing, cyclic voltammetry (CV) activation was performed. Polarization curves were obtained through linear sweep voltammetry (LSV) with a scan rate of  $2 \text{ mV} \cdot \text{s}^{-1}$ , and the testing potential range was  $-0.7 \text{ V} \sim -0.1 \text{ V}$  (vs.SCE). All test potentials were converted relative to the reversible hydrogen electrode (RHE) using the formula:

$$E(\text{vs.RHE}) = E(\text{vs.SCE}) + 0.0591 \times \text{pH} + 0.2412$$

No iR compensation applied to any potential. In an N<sub>2</sub>-saturated solution, the stability test for the hydrogen evolution reaction (HER) at a current density of 10 mA·cm<sup>-2</sup> was conducted using the chronopotentiometry method. By measuring CV curves at different scan rates (20, 40, 60, 80, 100 mV s<sup>-1</sup>) between 0.2 ~ 0.3V (vs RHE), the capacitance (C<sub>dl</sub>) in the non-Faradaic region was calculated, and ECSA (electrochemical active surface area) was determined through C<sub>dl</sub>. Electrochemical impedance spectroscopy (EIS) was recorded in the range of 0.01Hz to 100kHz at an overpotential of 100mV for evaluating the dynamics of the electrochemical reaction.

### **TOF calculation**

The formula for calculating TOF based on the exchange current density(*j*<sub>0</sub>) is as follows:

$$TOF_0 = \frac{j_0 \times S}{2F \times M}$$

Where, the *j*<sub>0</sub> is the exchange current density, S is the area of the modified Electrode (0.0707cm<sup>2</sup>), F is the Faraday's constant and M is the number of moles of Pt in the catalysts.

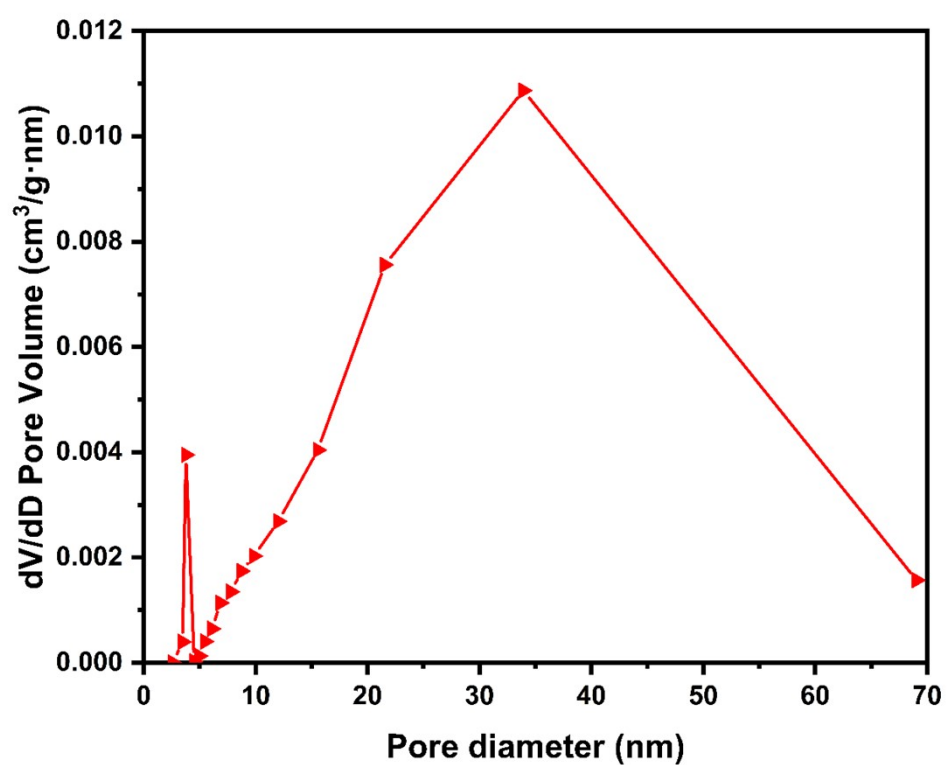

**Fig. S1** The pore volume distribution of S-C<sub>3</sub>N<sub>4</sub>.

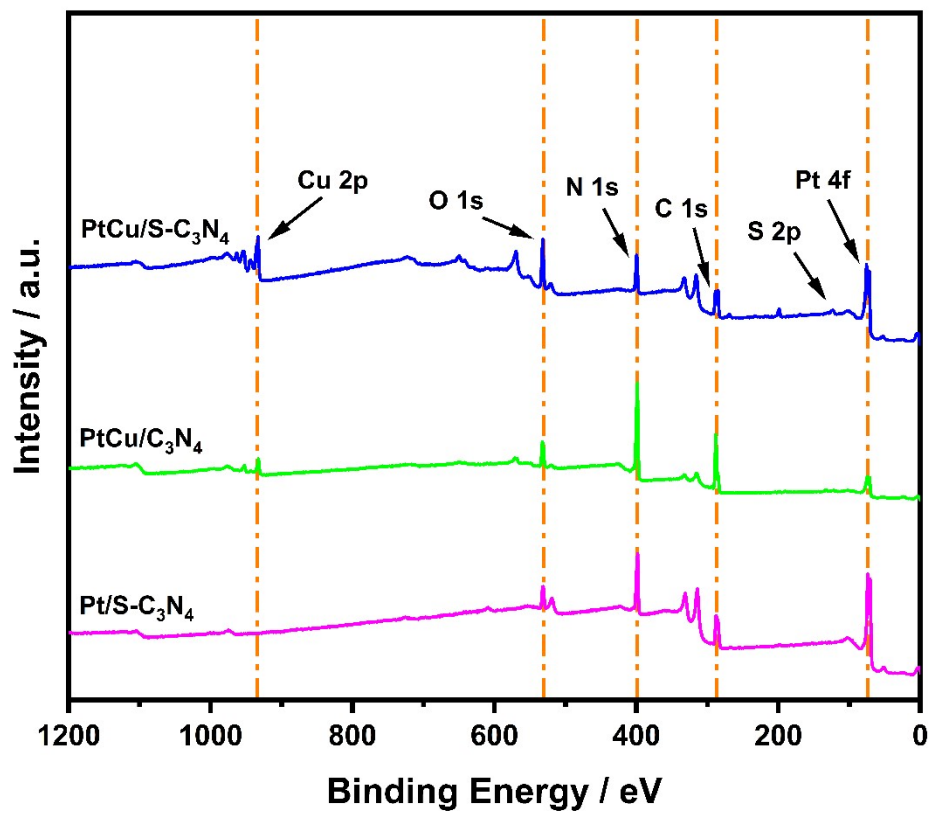

Fig. S2 The full XPS spectrum of the prepared catalyst.

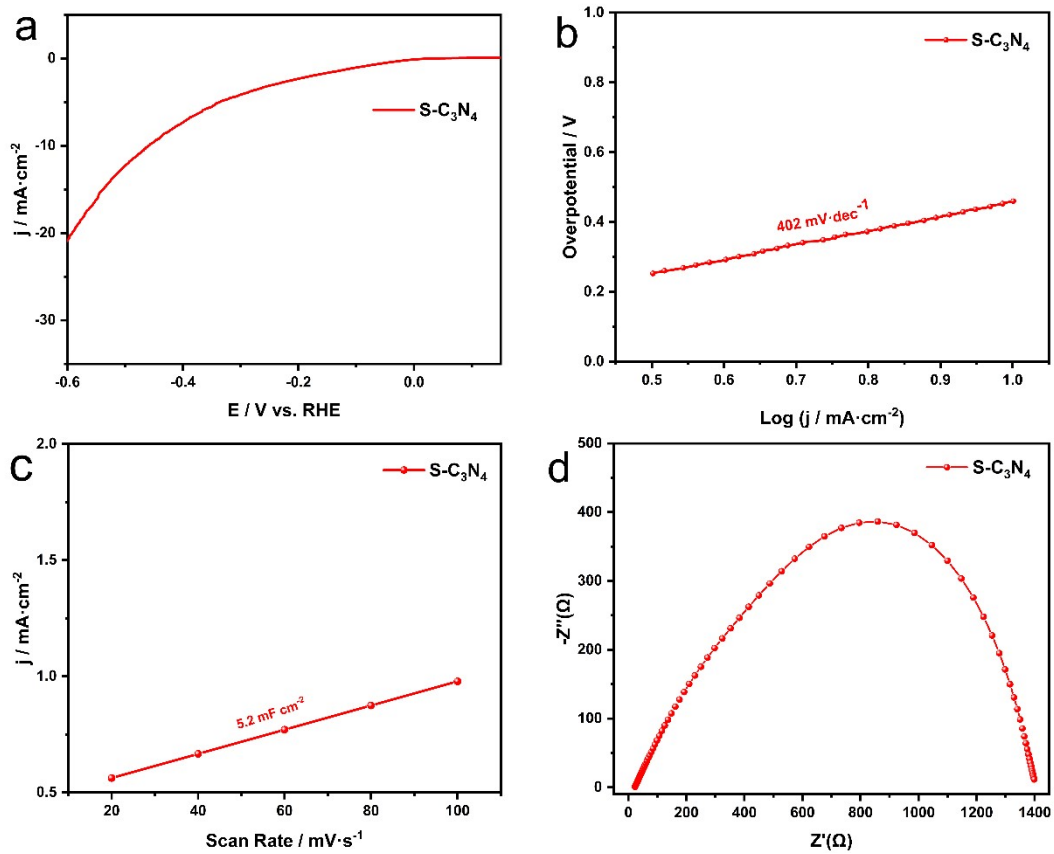

**Fig. S3** The Electrocatalytic performance of S-C<sub>3</sub>N<sub>4</sub>. (a) LSV curve in N<sub>2</sub> saturated 0.5 H<sub>2</sub>SO<sub>4</sub>, (b) the Tafel slope, (c) the double-layer capacitance ( $C_{dl}$ ), (d) Nyquist plots at an overpotential of @100 mV.

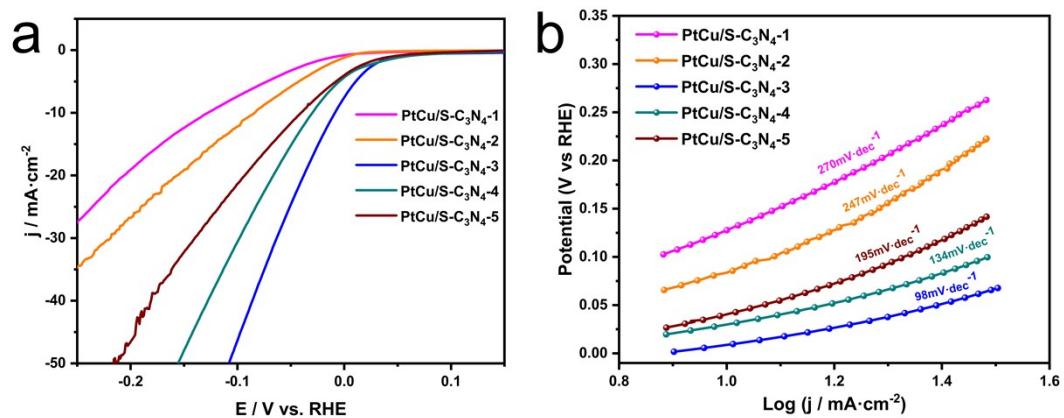

**Fig. S4** The LSV curves of different contents of Pt (a) for PtCu/S-C<sub>3</sub>N<sub>4</sub> in N<sub>2</sub> saturated 0.5 H<sub>2</sub>SO<sub>4</sub>, (b) the Tafel slope of PtCu/S-C<sub>3</sub>N<sub>4</sub>-1, PtCu/S-C<sub>3</sub>N<sub>4</sub>-2, PtCu/S-C<sub>3</sub>N<sub>4</sub>-3, PtCu/S-C<sub>3</sub>N<sub>4</sub>-4, PtCu/S-C<sub>3</sub>N<sub>4</sub>-5.

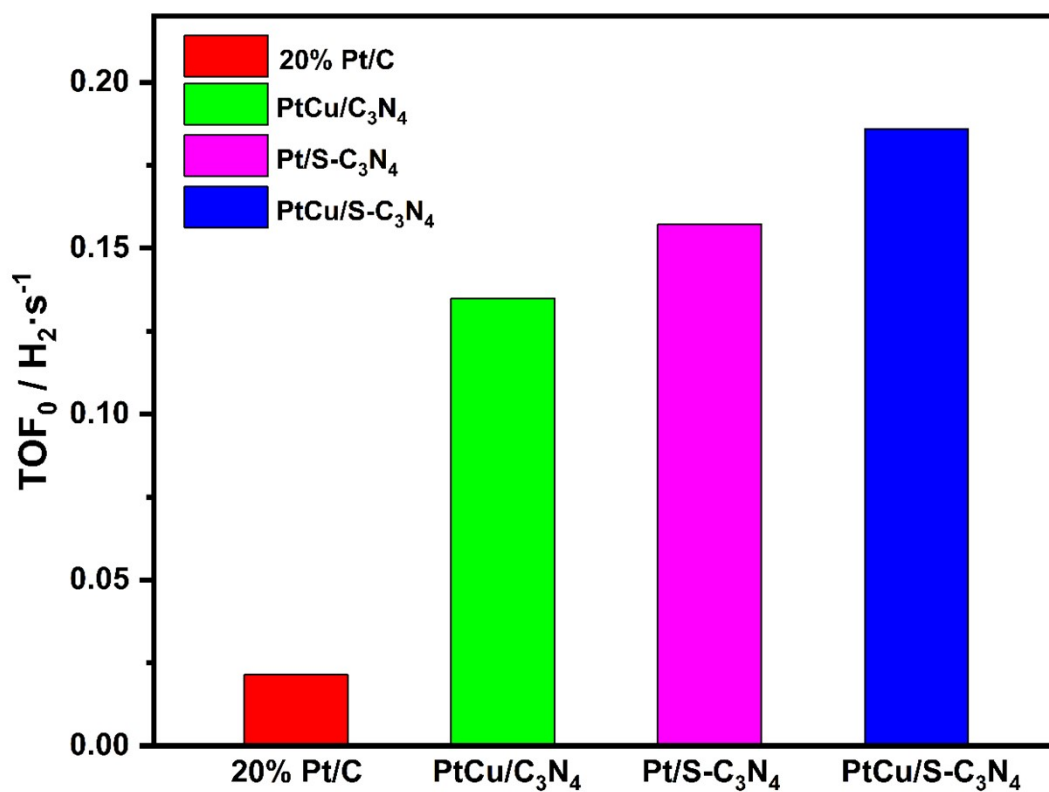

**Fig. S5** The turnover frequency (TOF<sub>0</sub>) of 20% Pt/C, PtCu/C<sub>3</sub>N<sub>4</sub>, Pt/S-C<sub>3</sub>N<sub>4</sub>, PtCu/S-C<sub>3</sub>N<sub>4</sub>.



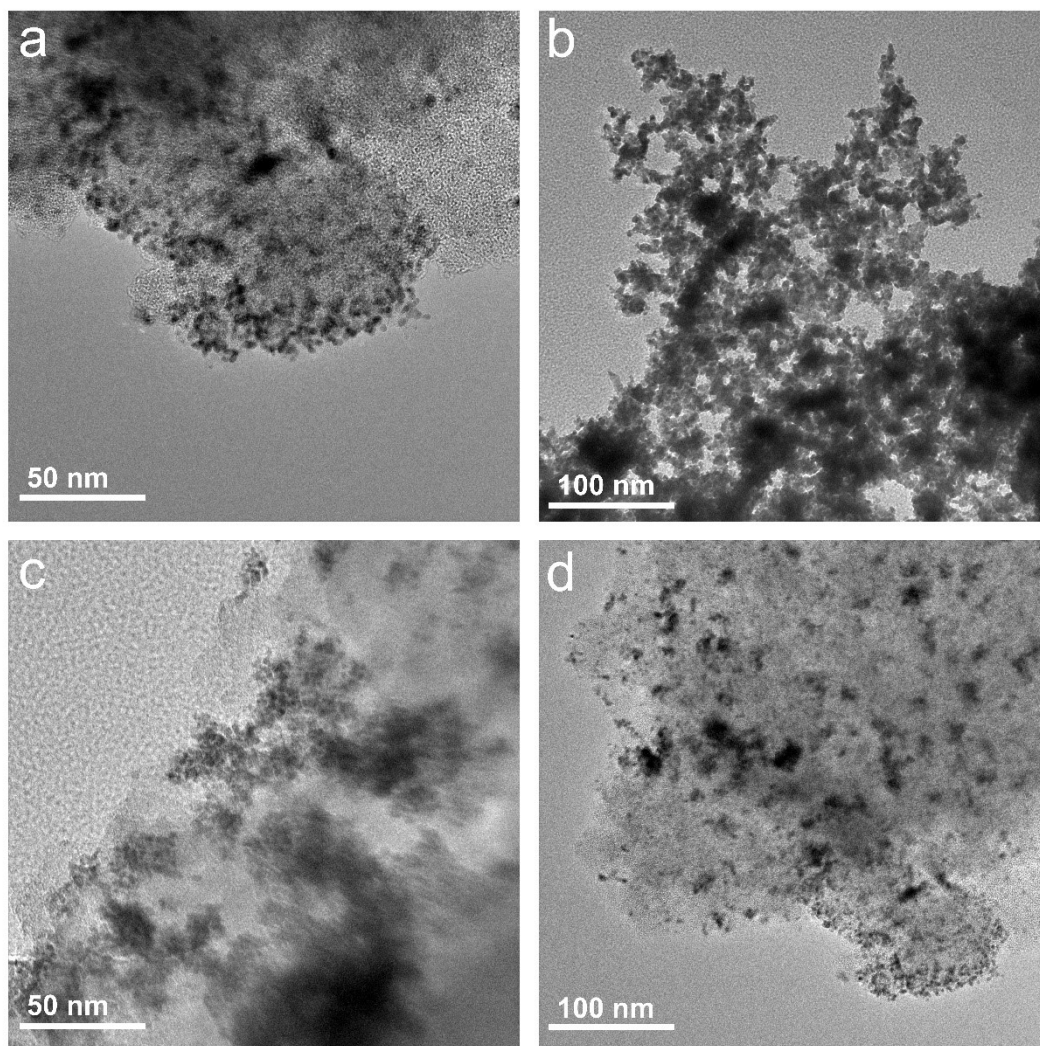

**Fig. S6** The TEM image of 20 % Pt/C before (a) and after (b) HER test , PtCu/S-C<sub>3</sub>N<sub>4</sub> before (c) and after (d) HER test.

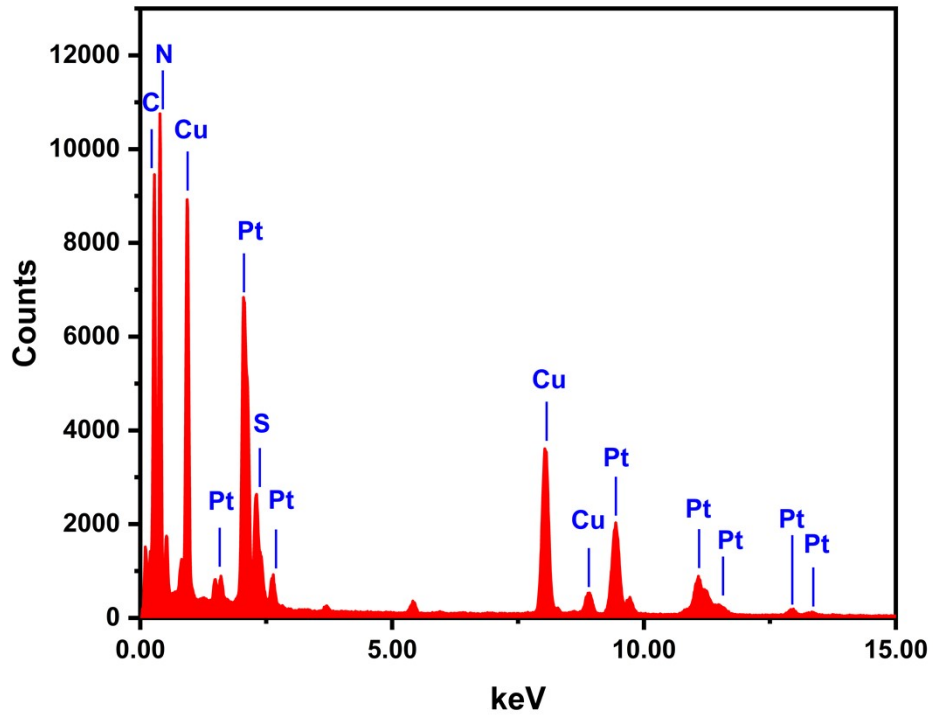

Fig. S7 The EDS corresponding to Figure 2f.

**Table. S1** The Pt content of as-prepared catalysts.

| Catalysts                               | Raw materials                      | Raw materials         | Raw materials         | Cu content<br>(wt%) | Pt content<br>(wt%) |
|-----------------------------------------|------------------------------------|-----------------------|-----------------------|---------------------|---------------------|
|                                         | C <sub>3</sub> N <sub>4</sub> (mg) | Pt <sup>4+</sup> (mL) | Cu <sup>2+</sup> (mL) |                     |                     |
| PtCu/S-C <sub>3</sub> N <sub>4</sub> -1 | 50                                 | 1                     | 5                     | 5.8                 | 1.8                 |
| PtCu/S-C <sub>3</sub> N <sub>4</sub> -2 | 50                                 | 2.5                   | 5                     | 5.7                 | 4.4                 |
| PtCu/S-C <sub>3</sub> N <sub>4</sub> -3 | 50                                 | 5                     | 5                     | 5.4                 | 8.4                 |
| PtCu/S-C <sub>3</sub> N <sub>4</sub> -4 | 50                                 | 7.5                   | 5                     | 5.2                 | 12.1                |
| PtCu/S-C <sub>3</sub> N <sub>4</sub> -5 | 50                                 | 10                    | 5                     | 5                   | 15.5                |
| PtCu/C <sub>3</sub> N <sub>4</sub>      | 50                                 | 5                     | 5                     | 5.4                 | 8.4                 |
| Pt/S-C <sub>3</sub> N <sub>4</sub>      | 50                                 | 5                     | 0                     | 0                   | 8.8                 |

**Table. S2** The HER performance of the prepared catalysts.

| Catalysts                            | $\eta_{10}$<br>(mV) | tafel slope<br>(V·dec <sup>-1</sup> ) | $j_0$<br>(mA·cm <sup>-2</sup> ) | TOF<br>(s <sup>-1</sup> ) |
|--------------------------------------|---------------------|---------------------------------------|---------------------------------|---------------------------|
| PtCu/S-C <sub>3</sub> N <sub>4</sub> | 10                  | 98                                    | 7.72                            | 0.186                     |
| Pt/S-C <sub>3</sub> N <sub>4</sub>   | 15                  | 133                                   | 6.82                            | 0.157                     |
| PtCu/C <sub>3</sub> N <sub>4</sub>   | 21                  | 105                                   | 5.59                            | 0.134                     |
| 20%Pt/C                              | 35                  | 68                                    | 2.09                            | 0.021                     |
| S-C <sub>3</sub> N <sub>4</sub>      | 460                 | 402                                   | 0.127                           | —                         |

**Table. S3** Summary of recently reported HER electrocatalysts in different electrolytes.

| Catalysts                                                 | Electrolyte                         | Overpotential at<br>10 mA·cm <sup>-2</sup> | Tafel slope<br>(mV·dec <sup>-1</sup> ) | References                                      |
|-----------------------------------------------------------|-------------------------------------|--------------------------------------------|----------------------------------------|-------------------------------------------------|
| PtCu/S-C <sub>3</sub> N <sub>4</sub>                      | 0.5M H <sub>2</sub> SO <sub>4</sub> | 10                                         | 98                                     | This work                                       |
| Pt-C <sub>3</sub> N <sub>4</sub> /rGO                     | 0.5M H <sub>2</sub> SO <sub>4</sub> | 22                                         | 30                                     | Int.J.Hydrogen.Energy,2019,29,31<br>121-31128   |
| Ru-C <sub>3</sub> N <sub>4</sub> /rGO                     | 0.5M H <sub>2</sub> SO <sub>4</sub> | 80                                         | 56                                     | ChemSusChem,2018, 11, 130-136                   |
| Pt/GP-o-300                                               | 1M KOH                              | 144                                        | 75.9                                   | J.Electroanal.Chem.,2023,939,117<br>476         |
| Pt/Ti <sub>3</sub> C <sub>2</sub> Tx-rGO <sub>3D</sub>    | 0.1 M KOH                           | 41                                         | 28                                     | FULLER.NANOTUB.CAR.N.,202<br>3,31,130-135       |
| n-PdCu@NDCDs                                              | 0.5M H <sub>2</sub> SO <sub>4</sub> | 44                                         | 88                                     | New J. Chem., 2023, 47, 14355                   |
| DA-Pt (1 : 1)                                             | 0.5M H <sub>2</sub> SO <sub>4</sub> | 17                                         | 29.1                                   | New J. Chem., 2023,47, 10273                    |
| PtNi-NC                                                   | 0.5M H <sub>2</sub> SO <sub>4</sub> | 30                                         | 27                                     | Sci.China.Mater.,2023,66(4):1389<br>-1397       |
| Fe <sub>1</sub> Pt <sub>3</sub> -MoS <sub>2</sub>         | 0.5M H <sub>2</sub> SO <sub>4</sub> | 59                                         | 38                                     | Ionics,2023,29,871-875                          |
| Co@CNTs Ru                                                | 1M KOH                              | 10                                         | 37.8                                   | Nano-Micro.Lett.,2022,14:186                    |
| PtNi@La-CNFs                                              | 1M KOH                              | 32                                         | 51                                     | Int.J.Hydrogen.Energy,2022,47,24<br>23-2432     |
| O-Ti <sub>50</sub> Ni <sub>30</sub> Pt <sub>20</sub> /CNT | 1M KOH                              | 21                                         | 25.7                                   | J.Mater.Chem.C.,2022,10, 15177                  |
|                                                           | 0.5M H <sub>2</sub> SO <sub>4</sub> | 36                                         | 28.7                                   |                                                 |
| Ru@S/N/CNT                                                | 1M KOH                              | 9                                          | 37                                     | New J. Chem., 2022, 46, 15804                   |
|                                                           | 0.5M H <sub>2</sub> SO <sub>4</sub> | 68                                         | 44                                     |                                                 |
| CoPt <sub>3</sub> @NC                                     | 1M KOH                              | 65                                         | 67                                     | Electrochemical Science<br>Advances,2022,2, 1-9 |
| Pt-PNWs                                                   | 0.5M H <sub>2</sub> SO <sub>4</sub> | 27                                         | 24.3                                   | Bull.Korean.Chem.Soc.,2022,43,1<br>111-1117.    |
| Pt-doped WS <sub>2</sub>                                  | 0.5M H <sub>2</sub> SO <sub>4</sub> | 60                                         | 40                                     | J.Appl.Electrochem.,2022.52,499-<br>507         |

**Table. S4** The corresponding element content of Fig.S7

| Element | Atom% |
|---------|-------|
| C       | 53.11 |
| N       | 34.26 |
| S       | 1.46  |
| Pt      | 4.31  |
| Cu      | 6.85  |
